# Supplementary material
Source: PubMed Central journal article supplement (PMC527186)
Supplement: plntcell_tpc.104.025502_1.pdf [file plntcell_tpc.104.025502_1.pdf]

| <b>Table S1.</b> Origins of wild accessions used in this study |                    |                         |                |
|----------------------------------------------------------------|--------------------|-------------------------|----------------|
| Genotype ID                                                    | Species            | Origin                  | Year collected |
| W66336A                                                        | <i>L. serriola</i> | Derbent, Russia         | 93             |
| US93UC-10                                                      | <i>L. saligna</i>  | Unknown <sup>a</sup>    |                |
| CGN9311                                                        | <i>L. saligna</i>  | Rehovot, Israel         | 76             |
| PI491204                                                       | <i>L. saligna</i>  | Greece                  | 83             |
| 289                                                            | <i>L. serriola</i> | North Galilee, Israel   | 94             |
| 383                                                            | <i>L. serriola</i> | Mt Carmel, Israel       | 94             |
| 541                                                            | <i>L. serriola</i> | Shefayim, Israel        | 94             |
| 639                                                            | <i>L. serriola</i> | Beer Sheva, Israel      | 94             |
| 1274                                                           | <i>L. serriola</i> | Salinas, CA, USA        | 95             |
| 1420                                                           | <i>L. serriola</i> | Netaniyya, Israel       | 95             |
| 2296                                                           | <i>L. serriola</i> | Yolo, CA, USA           | 95             |
| 2351                                                           | <i>L. saligna</i>  | Yolo, CA, USA           | 95             |
| 2352                                                           | <i>L. saligna</i>  | Yolo, CA, USA           | 95             |
| 2353                                                           | <i>L. saligna</i>  | Yolo, CA, USA           | 95             |
| 2401                                                           | <i>L. serriola</i> | Road 29, Davis, CA, USA | 95             |
| 2497                                                           | <i>L. serriola</i> | Road 32, Davis, CA, USA | 95             |
| 5013                                                           | <i>L. serriola</i> | Alcanices, Spain        | 94             |
| 5036                                                           | <i>L. serriola</i> | Rostock, Germany        | 96             |
| 5061                                                           | <i>L. serriola</i> | Lake Como, Italy        | 97             |
| A9                                                             | <i>L. serriola</i> | Chor, Armenia           | 98             |
| A27                                                            | <i>L. serriola</i> | Abovion, Armenia        | 98             |
| A47                                                            | <i>L. serriola</i> | Areni, Armenia          | 98             |
| A68                                                            | <i>L. saligna</i>  | Sevan, Armenia          | 98             |
| A69                                                            | <i>L. serriola</i> | Sevan, Armenia          | 98             |
| A83                                                            | <i>L. serriola</i> | Artanish, Armenia       | 98             |
| T10                                                            | <i>L. serriola</i> | Goreme, Turkey          | 98             |
| T36                                                            | <i>L. serriola</i> | Kaiseri, Turkey         | 98             |
| T46                                                            | <i>L. serriola</i> | Sivas-Kaiseri, Turkey   | 98             |
| T75                                                            | <i>L. serriola</i> | Sivas, Turkey           | 98             |
| T112                                                           | <i>L. serriola</i> | Istanbul, Turkey        | 98             |
| T122                                                           | <i>L. serriola</i> | Bolu, Turkey            | 98             |
| T123                                                           | <i>L. serriola</i> | Bolu, Turkey            | 98             |
| T124                                                           | <i>L. serriola</i> | Bolu, Turkey            | 98             |
| T125                                                           | <i>L. serriola</i> | Bolu, Turkey            | 98             |
| T128                                                           | <i>L. serriola</i> | Bolu, Turkey            | 98             |
| T133                                                           | <i>L. serriola</i> | Bolu, Turkey            | 98             |
| T135                                                           | <i>L. serriola</i> | Bolu, Turkey            | 98             |
| T138                                                           | <i>L. serriola</i> | Bolu, Turkey            | 98             |
| T139                                                           | <i>L. serriola</i> | Bolu, Turkey            | 98             |
| T142                                                           | <i>L. saligna</i>  | Ankara, Turkey          | 98             |
| T143                                                           | <i>L. saligna</i>  | Ankara, Turkey          | 98             |
| T168                                                           | <i>L. serriola</i> | Yakakent, Turkey        | 98             |
| T181                                                           | <i>L. serriola</i> | Bergama, Turkey         | 98             |
| PI274378                                                       | <i>L. perennis</i> | France                  | 61             |

<sup>a</sup> This was originally labeled as Accession CGN14271, *L. serriola* from Hungary.
